# Supplementary material for: Honeysuckle anthocyanin supplementation prevents diet-induced obesity in C57BL/6 mice
Source: Royal Society of Chemistry journal article supplement (doi:10.1039/c3fo60251f), 2013-01-01
Supplement: c3fo60251f.pdf [file c3fo60251f.pdf]

## Supplemental

**Table 1**  
**Composition of diets fed to mice**

| Ingredient                            | MD10% Fat | MD45% Fat |
|---------------------------------------|-----------|-----------|
| Casein                                | 18.96     | 23.31     |
| L-cystein                             | 0.28      | 0.35      |
| Corn starch                           | 29.86     | 8.48      |
| Maltodextrin                          | 3.32      | 11.65     |
| Sucrose                               | 33.17     | 20.14     |
| Cellulose                             | 4.74      | 5.83      |
| Soybean oil                           | 2.37      | 2.91      |
| Lard                                  | 1.9       | 20.68     |
| Mineral Mix                           | 0.95      | 1.16      |
| Phosphate dicalcium                   | 1.23      | 1.51      |
| Carbonate calcium                     | 0.5       | 0.64      |
| Potassium citrate, 1 H <sub>2</sub> O | 1.56      | 1.92      |
| Vitamin Mix                           | 0.95      | 1.16      |
| Choline bitartrate                    | 0.19      | 0.23      |
| Total                                 | 99.98     | 99.97     |
| Energy Composition                    | 100       | 100       |
| Protein                               | 20        | 20        |
| Carbohydrate                          | 70        | 35        |
| Fat                                   | 10        | 45        |
